# Supplementary material
Source: PubMed Central journal article supplement (PMC4970884)
Supplement: NIHMS793879-supplement-125_2016_4003_MOESM1_ESM.pdf [file NIHMS793879-supplement-125_2016_4003_MOESM1_ESM.pdf]

ESM Figure 1. Diabetes Incidence Hazard Ratios for Baseline Inadequate, Average and Optimal Total Cardiovascular Health Score

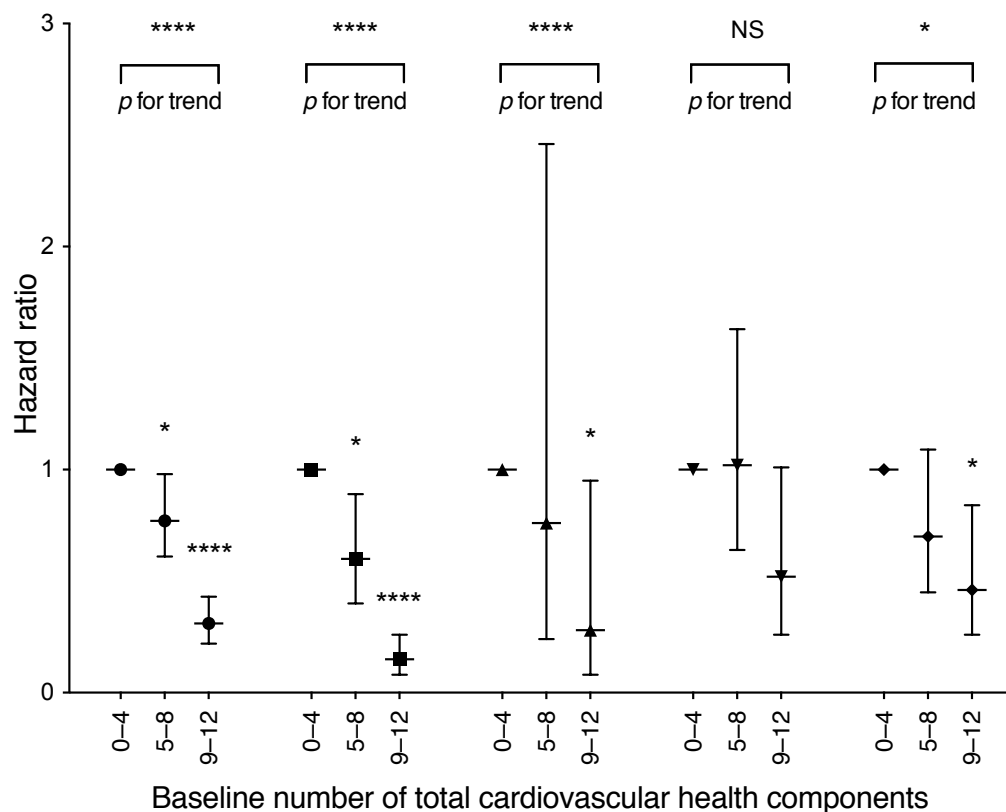

Legend ESM Figure 1. Diabetes Incidence Hazard Ratios for Baseline Inadequate, Average and Optimal Total Cardiovascular Health Score

Total Cardiovascular Health was classified as Inadequate (Total Score 0-4) (referent group, hazard ratio = 1), Average (Total Score 5-8) and Optimal (Total Score 9-12). See Table 1 for scoring classification per component. Circles, all race/ethnicities; squares, non-Hispanic white participants; up-pointing triangles, Chinese American participants; down-pointing triangles, African American participants; diamonds, Hispanic American participants. Cox models and Log-rank test (p for trend) with statistical significance \*, \*\*, \*\*\* and \*\*\*\* for p<0.05, p<0.01, p<0.001, and p<0.0001, respectively. NS, non-significant
