# Supplementary material
Source: PubMed Central journal article supplement (PMC4970884)
Supplement: NIHMS793879-supplement-125_2016_4003_MOESM2_ESM.pdf [file NIHMS793879-supplement-125_2016_4003_MOESM2_ESM.pdf]

ESM Table 1. Characteristics of Participants Included vs. Excluded in this Multi-Ethnic Study of Atherosclerosis Study Sample 2000-2012<sup>a</sup>

| Characteristic <sup>a</sup>                                          | Included<br>n=5,348  | Excluded<br>n=583    | p-value <sup>b</sup> |
|----------------------------------------------------------------------|----------------------|----------------------|----------------------|
| Age                                                                  | 61.9 (10.3)          | 61.0 (10.0)          | p=0.06               |
| Race                                                                 |                      |                      |                      |
| non-Hispanic white, %                                                | 42.6                 | 30.7                 |                      |
| Chinese American, %                                                  | 12.6                 | 3.6                  |                      |
| African American, %                                                  | 24.2                 | 43.7                 |                      |
| Hispanic American, %                                                 | 20.6                 | 22.0                 | p<0.01               |
| Female, %                                                            | 53.5                 | 54.0                 | p=0.81               |
| Education $\geq$ bachelor's degree, %                                | 37.8                 | 27.4                 | p<0.01               |
| Employed, % full time                                                | 39.4                 | 45.3                 | p=0.03               |
| Current smoking, %                                                   | 14.0                 | 19.0                 | p<0.01               |
| Current alcohol use, %                                               | 58.3                 | 53.8                 | p<0.01               |
| Exercise, physical activity MET min/week <sup>c</sup>                | 1603 (2410)          | 1359 (1765)          | p=0.02               |
| Body-mass index (kg/m <sup>2</sup> )                                 | 27.9 (5.3)           | 29.4 (5.9)           | p<0.01               |
| eGFR CKD-EPI, ml min <sup>-1</sup> 1.73 m <sup>-2</sup> <sup>d</sup> | 78 (16)              | 78 (17)              | p=0.41               |
| Systolic blood pressure, mmHg                                        | 125 (21)             | 127 (23)             | p=0.06               |
| Diastolic blood pressure, mmHg                                       | 72 (10)              | 73 (10)              | p=0.05               |
| Fasting plasma glucose, mmol/L (mg/dL)                               | 5.00 (0.61), 89 (10) | 5.05 (0.62), 91 (11) | p<0.01               |
| Total cholesterol, mmol/L (mg/dL)                                    | 5.1 (0.9), 195 (35)  | 5.1 (0.9), 196 (34)  | p=0.59               |
| Ideal cardiovascular diet score, 0-5 <sup>e</sup>                    | 1.5 (0.9)            | 2.8 (0.7)            | p<0.01               |
| Incident Diabetes <sup>f</sup>                                       | 11.1 (10.3, 12.1)    | 14.7 (11.7, 18.4)    | p=0.03               |

<sup>a</sup> Values are mean (SD) or percentages unless otherwise indicated

<sup>b</sup> p values calculated using  $\chi^2$  (categorical variables), ANOVA (continuous variables)

<sup>c</sup> Adapted for MESA: MET (metabolic equivalent of task) min/week

<sup>d</sup> eGFR CKD-EPI = Estimated glomerular filtration rate based on the Chronic Kidney Disease Epidemiology Collaboration

<sup>e</sup> Adapted for MESA: fruits and vegetables,  $\geq 1.08$  L (4.5 cups)/day; fish, two or more 98 g (3.5 ounce) servings per week (non-fried); fibre-rich whole grains, three or more 28 g (1 ounce)-equivalent servings/day; sodium, <1,500 mg/day; sugar-sweetened beverages,  $\leq 1,884$  kJ (1008 g)/week

<sup>f</sup> Rate per 1000 person-years (95% CI)
