# Supplementary material
Source: PubMed Central journal article supplement (PMC4970884)
Supplement: NIHMS793879-supplement-125_2016_4003_MOESM3_ESM.pdf [file NIHMS793879-supplement-125_2016_4003_MOESM3_ESM.pdf]

ESM Table 2: Baseline Characteristics of Participants by Development of Type 2 Diabetes Mellitus in the Multi-Ethnic Study of Atherosclerosis 2000-2012.

| Characteristic <sup>a</sup>                                          | No<br>n=4,761       | Yes<br>n=587        | p value <sup>b</sup> |
|----------------------------------------------------------------------|---------------------|---------------------|----------------------|
| Age                                                                  | 62.0 (10.4)         | 61.0 (9.5)          | p=0.026              |
| Female, %                                                            | 53.8                | 51.5                | p=0.287              |
| Education $\geq$ bachelor's degree, %                                | 38.8                | 32.4                | p=0.042              |
| Employed, % full time                                                | 39.4                | 39.0                | p=0.231              |
| Current smoking, %                                                   | 14.0                | 14.0                | p=0.865              |
| Current alcohol use, %                                               | 58.8                | 54.5                | p=0.131              |
| Exercise, physical activity MET min/week <sup>c</sup>                | 1619 (2405)         | 1473 (2450)         | p=0.166              |
| Body-mass index (kg/m <sup>2</sup> )                                 | 27.5 (5.1)          | 30.8 (5.7)          | p<0.0001             |
| eGFR CKD-EPI, ml min <sup>-1</sup> 1.73 m <sup>-2</sup> <sup>d</sup> | 77 (15)             | 80 (16)             | p<0.0001             |
| Systolic blood pressure, mmHg                                        | 125 (21)            | 130 (20)            | p<0.0001             |
| Diastolic blood pressure, mmHg                                       | 72 (10)             | 74 (11)             | p<0.0001             |
| Fasting plasma glucose, mmol/L (mg/dL)                               | 4.9 (0.5), 88 (9)   | 5.6 (0.7), 101 (13) | p<0.0001             |
| Total cholesterol, mmol/L (mg/dL)                                    | 5.1 (0.9), 195 (35) | 5.1 (0.9), 195 (37) | p=0.930              |
| Ideal cardiovascular diet score, 0-5 <sup>e</sup>                    | 1.5 (0.9)           | 1.5 (0.9)           | p=0.704              |
| Participants with Ideal Cardiovascular Diet Intake (%)               | 1.5                 | 1.9                 | p=0.740              |

<sup>a</sup> Values are mean (SD) or percentages unless otherwise indicated

<sup>b</sup> p values calculated using  $\chi^2$  (categorical variables), ANOVA (continuous variables)

<sup>c</sup> Adapted for MESA: MET (metabolic equivalent of task) min/week

<sup>d</sup> eGFR CKD-EPI = Estimated glomerular filtration rate based on the Chronic Kidney Disease Epidemiology Collaboration

<sup>e</sup> Adapted for MESA: fruits and vegetables,  $\geq 1.08$  L (4.5 cups)/day; fish, two or more 98 g (3.5 ounce) servings per week (non-fried); fibre-rich whole grains, three or more 28 g (1 ounce)-equivalent servings/day; sodium, <1,500 mg/day; sugar-sweetened beverages,  $\leq 1,884$  kJ (1008 g)/week
