# Supplementary material
Source: PubMed Central journal article supplement (PMC4970884)
Supplement: NIHMS793879-supplement-125_2016_4003_MOESM4_ESM.pdf [file NIHMS793879-supplement-125_2016_4003_MOESM4_ESM.pdf]

ESM Table 3: Likelihood Ratio Test for Interaction among Age, Gender, Race/Ethnicity at Baseline

| <i>P</i> for interaction <sup>a</sup>                                          | Age     | Gender  | Race/Ethnicity |
|--------------------------------------------------------------------------------|---------|---------|----------------|
| Attainment of Ideal Cardiovascular Health Components (0-6)                     | p=0.320 | p=0.811 | p=0.001        |
| Attainment of Ideal Cardiovascular Health Components (3 Tiered Classification) | p=0.553 | p=0.813 | p<0.001        |
| Total Cardiovascular Health Score (0-12)                                       | p=0.110 | p=0.496 | p=0.005        |
| Total Cardiovascular Health Score (3 Tiered Classification)                    | p=0.298 | p=0.910 | p=0.002        |

<sup>a</sup>*P* for interaction calculated using multiplicative interaction terms and application of the likelihood ratio test
