# Supplementary material
Source: PubMed Central journal article supplement (PMC4970884)
Supplement: NIHMS793879-supplement-125_2016_4003_MOESM5_ESM.pdf [file NIHMS793879-supplement-125_2016_4003_MOESM5_ESM.pdf]

ESM Table 4. Baseline Total Cardiovascular Health Score in the Multi-Ethnic Study of Atherosclerosis <sup>a</sup>

|                                            | Overall | non-Hispanic white | Chinese American | African American | Hispanic American |
|--------------------------------------------|---------|--------------------|------------------|------------------|-------------------|
|                                            | n= 5348 | n=2277             | n=676            | n=1293           | n=1102            |
| Baseline Total Cardiovascular Health Score |         |                    |                  |                  |                   |
| Inadequate (0-4) (%)                       | 9.0     | 7.2                | 2.5              | 12.9             | 12.0              |
| Average (5-8) (%)                          | 65.1    | 62.8               | 53.4             | 70.7             | 70.5              |
| Optimal (9-12) (%)                         | 25.9    | 30.0               | 44.1             | 16.4             | 17.5              |

<sup>a</sup> 2 points for attainment of ideal cardiovascular health, 1 point for intermediate cardiovascular health and 0 points for poor cardiovascular health per metric were summed to create a total score ranging 0-12 and categorized as Inadequate (0-4), Average (5-8) or Optimal (9-12).
