# Supplementary material
Source: PubMed Central journal article supplement (PMC4970884)
Supplement: NIHMS793879-supplement-125_2016_4003_MOESM6_ESM.pdf [file NIHMS793879-supplement-125_2016_4003_MOESM6_ESM.pdf]

ESM Table 5. Diabetes Incidence Rates per 1000 Person-years for Baseline Levels of Total Cardiovascular Health

|                                                                                                         | Overall<br>n= 5348 | non-Hispanic white<br>n=2277 | Chinese American<br>n=676 | African American<br>n=1293 | Hispanic American<br>n=1102 |
|---------------------------------------------------------------------------------------------------------|--------------------|------------------------------|---------------------------|----------------------------|-----------------------------|
| Diabetes Incidence Rates by Total Cardiovascular Health Score <sup>a,b</sup>                            |                    |                              |                           |                            |                             |
| 0-2                                                                                                     | 26.3 (14.2, 48.9)  | 29.5 (11.1, 78.7)            | N/A <sup>c</sup>          | 13.6 (3.4, 54.3)           | N/A <sup>b</sup>            |
| 3                                                                                                       | 21.2 (14.3, 31.3)  | 19.5 (10.5, 36.3)            | N/A <sup>c</sup>          | 20.2 (9.6, 42.5)           | 26.7 (13.4, 53.4)           |
| 4                                                                                                       | 15.0 (11.1, 20.2)  | 16.3 (9.8, 27.0)             | 24.4 (7.9, 75.8)          | 11.4 (6.5, 20.1)           | 16.7 (9.7, 28.7)            |
| 5                                                                                                       | 16.5 (13.3, 20.4)  | 12.4 (8.4, 18.2)             | 4.4 (0.6, 31.2)           | 21.3 (15.2, 30.0)          | 19.4 (13.1, 28.7)           |
| 6                                                                                                       | 14.8 (12.4, 17.7)  | 16.2 (12.2, 21.6)            | 25.5 (15.6, 41.7)         | 11.6 (8.0, 16.9)           | 13.3 (9.2, 19.2)            |
| 7                                                                                                       | 12.0 (10.0, 14.3)  | 8.2 (5.9, 11.4)              | 18.5 (12.0, 28.7)         | 13.2 (9.4, 18.5)           | 15.1 (10.7, 21.3)           |
| 8                                                                                                       | 10.7 (8.9, 12.9)   | 7.5 (5.5, 10.4)              | 12.0 (7.6, 18.8)          | 12.6 (8.7, 18.4)           | 16.1 (11.2, 23.2)           |
| 9                                                                                                       | 6.2 (4.7, 8.1)     | 2.7 (1.5, 4.9)               | 6.1 (3.3, 11.4)           | 9.3 (5.4, 15.9)            | 14.2 (8.9, 22.9)            |
| 10                                                                                                      | 3.2 (1.9, 5.4)     | 0.9 (0.2, 3.5)               | 7.9 (4.0, 15.9)           | 1.8 (0.3, 12.7)            | 5.4 (1.7, 16.7)             |
| 11-12                                                                                                   | 3.2 (1.4, 7.2)     | 3.6 (1.3, 9.6)               | 2.3 (0.3, 16.4)           | 6.8 (1.0, 48.1)            | N/A <sup>c</sup>            |
| Rate-Ratio<br>per 1-unit increase                                                                       | 0.81 (0.78, 0.85)  | 0.73 (0.68, 0.79)            | 0.77 (0.67, 0.88)         | 0.89 (0.82, 0.97)          | 0.89 (0.82, 0.97)           |
| Diabetes Incidence Rates for Inadequate, Average and Optimal Total Cardiovascular Health <sup>a,b</sup> |                    |                              |                           |                            |                             |
| Inadequate (0-4)                                                                                        | 17.6 (14.1, 22.0)  | 18.5 (12.8, 26.6)            | 20.6 (6.6, 63.8)          | 13.6 (8.9, 20.9)           | 21.3 (14.4, 31.5)           |
| Average (5-8)                                                                                           | 13.0 (11.8, 14.2)  | 10.2 (8.7, 12.0)             | 15.9 (12.2, 20.7)         | 14.1 (11.8, 16.8)          | 15.6 (13.0, 18.7)           |
| Optimal (9-12)                                                                                          | 4.9 (3.9, 6.2)     | 2.3 (1.4, 3.7)               | 6.2 (3.9, 9.7)            | 7.1 (4.3, 11.8)            | 10.4 (6.7, 16.1)            |

|                     |                   |                   |                   |                   |                   |
|---------------------|-------------------|-------------------|-------------------|-------------------|-------------------|
| Rate-Ratio          |                   |                   |                   |                   |                   |
| per 1-unit increase | 0.53 (0.46, 0.62) | 0.38 (0.30, 0.49) | 0.45 (0.30, 0.68) | 0.75 (0.56, 1.00) | 0.71 (0.53, 0.94) |

---

<sup>a</sup> 2 points for attainment of ideal cardiovascular health, 1 point for intermediate cardiovascular health and 0 points for poor cardiovascular health per category, were summed to create a total score ranging 0-12 and categorized as Inadequate (0-4), Average (5-8) or Optimal (9-12).

<sup>b</sup> Rate per 1000 person-years with 95% confidence interval

<sup>c</sup> Unable to define incident diabetes rate due to a lack of participants meeting criteria for the category.
