# Supplementary material
Source: PubMed Central journal article supplement (PMC4970884)
Supplement: NIHMS793879-supplement-125_2016_4003_MOESM7_ESM.pdf [file NIHMS793879-supplement-125_2016_4003_MOESM7_ESM.pdf]

ESM Table 6. Diabetes Incidence Hazard Ratios by Total Cardiovascular Health Score

|                                                                                                              | Overall Unadjusted<br>n= 5348 | Multivariable Adjusted <sup>a</sup><br>n= 5348 | non-Hispanic white <sup>a</sup><br>n=2277 | Chinese American <sup>a</sup><br>n=676 | African American <sup>a</sup><br>n=1293 | Hispanic American <sup>a</sup><br>n=1102 |
|--------------------------------------------------------------------------------------------------------------|-------------------------------|------------------------------------------------|-------------------------------------------|----------------------------------------|-----------------------------------------|------------------------------------------|
| Diabetes Incidence Hazard Ratios by Total Cardiovascular Health Score, HR (95%CI)                            |                               |                                                |                                           |                                        |                                         |                                          |
| 1+2                                                                                                          | 1+2 (Referent)                | 1+2 (Referent)                                 | 1+2 (Referent)                            | 1+2 (Referent) <sup>b</sup>            | 1+2 (Referent)                          | 1+2 (Referent)                           |
| 3                                                                                                            | 0.80 (0.38, 1.66)             | 0.77 (0.37, 1.61)                              | 0.72 (0.23, 2.31)                         | N/A <sup>b</sup>                       | 1.66 (0.34, 8.04)                       | 0.52 (0.15, 1.76)                        |
| 4                                                                                                            | 0.56 (0.28, 1.12)             | 0.53 (0.27, 1.05)                              | 0.63 (0.21, 1.91)                         | N/A <sup>b</sup>                       | 0.92 (0.20, 4.12)                       | 0.32 (0.10, 1.00)                        |
| 5                                                                                                            | 0.62 (0.32, 1.19)             | 0.60 (0.31, 1.16)                              | 0.48 (0.17, 1.37)                         | N/A <sup>b</sup>                       | 1.69 (0.40, 7.10)                       | 0.37 (0.13, 1.08)                        |
| 6                                                                                                            | 0.56 (0.29, 1.06)             | 0.54 (0.28, 1.03)                              | 0.64 (0.23, 1.78)                         | N/A <sup>b</sup>                       | 0.92 (0.22, 3.88)                       | 0.25 (0.09, 0.73)                        |
| 7                                                                                                            | 0.45 (0.24, 0.86)             | 0.45 (0.24, 0.86)                              | 0.34 (0.12, 0.95)                         | N/A <sup>b</sup>                       | 1.02 (0.24, 4.26)                       | 0.28 (0.10, 0.81)                        |
| 8                                                                                                            | 0.40 (0.21, 0.77)             | 0.41 (0.21, 0.79)                              | 0.30 (0.11, 0.86)                         | N/A <sup>b</sup>                       | 1.01 (0.24, 4.28)                       | 0.30 (0.10, 0.88)                        |
| 9                                                                                                            | 0.23 (0.12, 0.46)             | 0.24 (0.12, 0.48)                              | 0.11 (0.04, 0.36)                         | N/A <sup>b</sup>                       | 0.72 (0.16, 3.23)                       | 0.27 (0.09, 0.82)                        |
| 10                                                                                                           | 0.12 (0.05, 0.27)             | 0.13 (0.06, 0.28)                              | 0.04 (0.01, 0.20)                         | N/A <sup>b</sup>                       | 0.14 (0.01, 1.56)                       | 0.10 (0.02, 0.44)                        |
| 11+12                                                                                                        | 0.12 (0.04, 0.33)             | 0.13 (0.05, 0.37)                              | 0.16 (0.04, 0.64)                         | N/A <sup>b</sup>                       | 0.52 (0.05, 5.80)                       | N/A                                      |
| P for trend <sup>c</sup>                                                                                     | p< 0.0001                     | p< 0.0001                                      | p< 0.0001                                 | N/A <sup>b</sup>                       | p<0.01                                  | p<0.01                                   |
| Diabetes Incidence Hazard Ratios for Inadequate, Average and Optimal Total Cardiovascular Health, HR (95%CI) |                               |                                                |                                           |                                        |                                         |                                          |
| Inadequate (0-4)                                                                                             | 1 (Referent)                  | 1 (Referent)                                   | 1 (Referent)                              | 1 (Referent)                           | 1 (Referent)                            | 1 (Referent)                             |
| Average (5-8)                                                                                                | 0.74 (0.58, 0.94)             | 0.77 (0.60, 0.98)                              | 0.60 (0.40, 0.89)                         | 0.76 (0.24, 2.46)                      | 1.02 (0.64, 1.63)                       | 0.70 (0.45, 1.09)                        |
| Optimal (9-12)                                                                                               | 0.28 (0.20, 0.38)             | 0.31 (0.22, 0.43)                              | 0.14 (0.08, 0.26)                         | 0.28 (0.08, 0.94)                      | 0.51 (0.26, 1.00)                       | 0.46 (0.26, 0.84)                        |
