# Supplementary material
Source: PubMed Central journal article supplement (PMC4970884)
Supplement: NIHMS793879-supplement-125_2016_4003_MOESM8_ESM.pdf [file NIHMS793879-supplement-125_2016_4003_MOESM8_ESM.pdf]

ESM Table 7. Diabetes Incidence Hazard Ratios for Baseline Levels of Ideal and Total Cardiovascular Health including Participants with Missing Data on Dietary Measures <sup>a</sup>

| Diabetes Incidence Hazard Ratios for Poor, Intermediate and Ideal Cardiovascular Health          |                      |                                 |                               |                               |                                |
|--------------------------------------------------------------------------------------------------|----------------------|---------------------------------|-------------------------------|-------------------------------|--------------------------------|
|                                                                                                  | Overall <sup>b</sup> | non-Hispanic white <sup>b</sup> | Chinese American <sup>b</sup> | African American <sup>b</sup> | Hispanic American <sup>b</sup> |
| Participants, n                                                                                  | 5,817 <sup>c</sup>   | 2,417                           | 689                           | 1,501                         | 1,210                          |
| Poor (0-1, ICH components)                                                                       | 1 (Referent)         | 1 (Referent)                    | 1 (Referent)                  | 1 (Referent)                  | 1 (Referent)                   |
| Intermediate (2-3, ICH components)                                                               | 0.66 (0.55, 0.80)    | 0.52 (0.37, 0.71)               | 0.41 (0.21, 0.79)             | 0.79 (0.57, 1.10)             | 0.75 (0.52, 1.09)              |
| Ideal (4+, ICH components)                                                                       | 0.25 (0.18, 0.33)    | 0.14 (0.08, 0.25)               | 0.13 (0.06, 0.29)             | 0.27 (0.14, 0.52)             | 0.50 (0.29, 0.85)              |
| Diabetes Incidence Hazard Ratios for Inadequate, Average and Optimal Total Cardiovascular Health |                      |                                 |                               |                               |                                |
| Inadequate (0-4)                                                                                 | 1 (Referent)         | 1 (Referent)                    | 1 (Referent)                  | 1 (Referent)                  | 1 (Referent)                   |
| Average (5-8)                                                                                    | 0.77 (0.61, 0.98)    | 0.55 (0.37, 0.81)               | 0.82 (0.26, 2.64)             | 1.12 (0.73, 1.75)             | 0.68 (0.45, 1.03)              |
| Optimal (9-12)                                                                                   | 0.32 (0.23, 0.43)    | 0.15 (0.08, 0.27)               | 0.30 (0.09, 1.00)             | 0.53 (0.29, 0.98)             | 0.45 (0.26, 0.78)              |

<sup>a</sup> Participants missing dietary components were given a score of zero for the dietary intake component of the cardiovascular health measures.

<sup>b</sup> Adjusted for age, education, sex, study site, race/ethnicity, occupation status, alcohol use, estimated glomerular filtration rate and race stratified analysis were not adjusted for race.

<sup>c</sup> Additional 469 participants included with 68 incident diabetes events, (140 Non-Hispanic White, 13 Chinese American, 208 African American, 108 Hispanic American)
