# Supplementary material
Source: PubMed Central journal article supplement (PMC4970884)
Supplement: NIHMS793879-supplement-125_2016_4003_MOESM9_ESM.pdf [file NIHMS793879-supplement-125_2016_4003_MOESM9_ESM.pdf]

ESM Table 8. Diabetes Incidence Hazard Ratios for Baseline Levels of Ideal and Total Cardiovascular Health adjusting for Covariates including Baseline Glucose

| Diabetes Incidence Hazard Ratios for Poor, Intermediate and Ideal Cardiovascular Health          |                      |                                 |                               |                               |                                |
|--------------------------------------------------------------------------------------------------|----------------------|---------------------------------|-------------------------------|-------------------------------|--------------------------------|
|                                                                                                  | Overall <sup>a</sup> | non-Hispanic white <sup>a</sup> | Chinese American <sup>a</sup> | African American <sup>a</sup> | Hispanic American <sup>a</sup> |
| Participants, n                                                                                  | 5,348                | 2,277                           | 676                           | 1,293                         | 1,102                          |
| Poor (0-1, ICH components)                                                                       | 1 (Referent)         | 1 (Referent)                    | 1 (Referent)                  | 1 (Referent)                  | 1 (Referent)                   |
| Intermediate (2-3, ICH components)                                                               | 0.74 (0.61, 0.90)    | 0.62 (0.44, 0.87)               | 0.51 (0.25, 1.02)             | 0.80 (0.55, 1.18)             | 0.87 (0.59, 1.28)              |
| Ideal (4+, ICH components)                                                                       | 0.43 (0.31, 0.59)    | 0.29 (0.16, 0.54)               | 0.21 (0.09, 0.49)             | 0.46 (0.23, 0.92)             | 0.96 (0.54, 1.70)              |
| Diabetes Incidence Hazard Ratios for Inadequate, Average and Optimal Total Cardiovascular Health |                      |                                 |                               |                               |                                |
| Inadequate (0-4)                                                                                 | 1 (Referent)         | 1 (Referent)                    | 1 (Referent)                  | 1 (Referent)                  | 1 (Referent)                   |
| Average (5-8)                                                                                    | 0.80 (0.63, 1.02)    | 0.57 (0.38, 0.86)               | 1.48 (0.44, 4.96)             | 0.88 (0.55, 1.41)             | 0.92 (0.59, 1.42)              |
| Optimal (9-12)                                                                                   | 0.45 (0.32, 0.63)    | 0.23 (0.12, 0.42)               | 0.59 (0.17, 2.07)             | 0.65 (0.33, 1.27)             | 0.91 (0.50, 1.66)              |

<sup>a</sup> Adjusted for age, education, sex, study site, race/ethnicity, occupation status, alcohol use, estimated glomerular filtration rate and glucose, race stratified analysis were not adjusted for race
