# Supplementary material
Source: PubMed Central journal article supplement (PMC4970884)
Supplement: NIHMS793879-supplement-125_2016_4003_MOESM10_ESM.pdf [file NIHMS793879-supplement-125_2016_4003_MOESM10_ESM.pdf]

ESM Table 9. Diabetes Incidence Hazard Ratios for Baseline Levels of Ideal and Total Cardiovascular Health including Glucose in the Models (All 7 American Heart Association Ideal Cardiovascular Health components)

| Diabetes Incidence Hazard Ratios for Poor, Intermediate and Ideal Cardiovascular Health          |                      |                                 |                               |                               |                                |
|--------------------------------------------------------------------------------------------------|----------------------|---------------------------------|-------------------------------|-------------------------------|--------------------------------|
|                                                                                                  | Overall <sup>a</sup> | non-Hispanic white <sup>a</sup> | Chinese American <sup>a</sup> | African American <sup>a</sup> | Hispanic American <sup>a</sup> |
| Participants, n                                                                                  | 5,348                | 2,277                           | 676                           | 1,293                         | 1,102                          |
| Poor (0-1, ICH components)                                                                       | 1 (Referent)         | 1 (Referent)                    | 1 (Referent)                  | 1 (Referent)                  | 1 (Referent)                   |
| Intermediate (2-3, ICH components)                                                               | 0.39 (0.30, 0.50)    | 0.33 (0.22, 0.49)               | 0.19 (0.09, 0.42)             | 0.41 (0.25, 0.67)             | 0.55 (0.33, 0.91)              |
| Ideal (4+, ICH components)                                                                       | 0.14 (0.10, 0.18)    | 0.09 (0.05, 0.14)               | 0.05 (0.02, 0.12)             | 0.18 (0.10, 0.32)             | 0.26 (0.15, 0.45)              |
| P for trend <sup>c</sup>                                                                         | p<0.0001             | p<0.0001                        | p<0.0001                      | p<0.001                       | p<0.001                        |
| Diabetes Incidence Hazard Ratios for Inadequate, Average and Optimal Total Cardiovascular Health |                      |                                 |                               |                               |                                |
| Inadequate (0-4)                                                                                 | 1 (Referent)         | 1 (Referent)                    | 1 (Referent)                  | 1 (Referent)                  | 1 (Referent)                   |
| Average (5-9)                                                                                    | 0.43 (0.28, 0.65)    | 0.36 (0.18, 0.71)               | N/A                           | 0.70 (0.29, 1.73)             | 0.34 (0.17, 0.68)              |
| Optimal (10-14)                                                                                  | 0.16 (0.10, 0.25)    | 0.10 (0.05, 0.20)               | N/A                           | 0.30 (0.11, 0.79)             | 0.17 (0.08, 0.37)              |
| P for trend <sup>c</sup>                                                                         | p<0.0001             | p<0.0001                        | N/A                           | p=0.054                       | p=0.017                        |

<sup>a</sup> Adjusted for age, education, sex, study site, race/ethnicity, occupation status, alcohol use and estimated glomerular filtration rate, race stratified analysis were not adjusted for race

<sup>b</sup> Chinese Americans excluded from analysis due to sample size

<sup>c</sup> P for trend calculated using the Log-rank test.
