# Supplementary material
Source: PubMed Central journal article supplement (PMC4970884)
Supplement: NIHMS793879-supplement-125_2016_4003_MOESM11_ESM.pdf [file NIHMS793879-supplement-125_2016_4003_MOESM11_ESM.pdf]

ESM Table 10. Diabetes Incidence Rate per 1000 Person-years and Hazard Ratios for Baseline Fasting Blood Glucose in Cardiovascular Health Categories <sup>b,c</sup>

| Diabetes Incidence Rates per 1000 Person-years by Baseline Fasting Blood Glucose for Intermediate and Ideal Cardiovascular Health |                   |                    |                   |                   |                   |
|-----------------------------------------------------------------------------------------------------------------------------------|-------------------|--------------------|-------------------|-------------------|-------------------|
|                                                                                                                                   | Overall           | non-Hispanic white | Chinese American  | African American  | Hispanic American |
| Intermediate                                                                                                                      | 46.8 (41.8, 52.4) | 47.7 (39.1, 58.2)  | 38.0 (28.1, 51.4) | 46.5 (37.3, 57.8) | 52.3 (42.0, 65.1) |
| Ideal                                                                                                                             | 6.2 (5.5, 7.0)    | 4.5 (3.7, 5.5)     | 6.4 (4.6, 8.9)    | 7.3 (5.8, 9.1)    | 8.9 (7.1, 11.1)   |

| Diabetes Incidence Hazard Ratios by Baseline Fasting Blood Glucose for Intermediate vs. Ideal Cardiovascular Health |                   |                               |                                 |                               |                               |                                |
|---------------------------------------------------------------------------------------------------------------------|-------------------|-------------------------------|---------------------------------|-------------------------------|-------------------------------|--------------------------------|
|                                                                                                                     | Overall           | Overall Adjusted <sup>a</sup> | non-Hispanic white <sup>a</sup> | Chinese American <sup>a</sup> | African American <sup>a</sup> | Hispanic American <sup>a</sup> |
| Intermediate                                                                                                        | 1 (Referent)      | 1 (Referent)                  | 1 (Referent)                    | 1 (Referent)                  | 1 (Referent)                  | 1 (Referent)                   |
| Ideal                                                                                                               | 0.13 (0.11, 0.16) | 0.13 (0.11, 0.15)             | 0.10 (0.07, 0.13)               | 0.13 (0.08, 0.21)             | 0.14 (0.10, 0.19)             | 0.16 (0.12, 0.22)              |

<sup>a</sup> Adjusted for age, education, sex, study site, race/ethnicity, occupation status, alcohol use and estimated glomerular filtration rate, race stratified analysis were not adjusted for race

<sup>b</sup> Fasting plasma glucose 5.55 – 6.94 mmol/l (100-125 mg/dl) or treated to goal was considered intermediate cardiovascular health and < 5.55 mmol/l (100 mg/dl) was considered ideal cardiovascular health (Figure 1).

<sup>c</sup> Hazard Ratios calculated using Cox-proportional Hazard Modeling with the poor category as the referent group
